# Supplementary material for: Composition Effect on the Formation of Oxide Phases by Thermal Decomposition of CuNiM(III) Layered Double Hydroxides with M(III) = Al, Fe
Source: MDPI journal article supplement (doi:10.3390/ma17010083), 2023-12-23
Supplement: s1 [file s1]

## SUPPORTING INFORMATION

### **Composition effect on the formation of oxide phases by thermal decomposition of CuNiM(III) layered double hydroxides with M(III) = Al, Fe**

Iqra Zubair Awan<sup>1,2,3</sup>, Phuoc Hoang Ho<sup>1,4</sup>, Giada Beltrami<sup>5</sup>, Bernard Fraisse<sup>1</sup>, Thomas Cacciaguerra<sup>1</sup>, Pierrick Gaudin<sup>1</sup>, Nathalie Tanchoux<sup>1</sup>, Stefania Albonetti<sup>2</sup>, Annalisa Martucci<sup>5</sup>, Fabrizio Cavani<sup>2</sup>, Francesco Di Renzo<sup>1</sup>, Didier Tichit<sup>1</sup>. \*

<sup>1</sup>ICGM, Université de Montpellier-CNRS-ENSCM, Montpellier, France

<sup>2</sup>Dip. Chimica Industriale Toso Montanari, Alma Mater Studiorum Università di Bologna,  
Bologna, Italy

<sup>3</sup>Dpt Chemistry, Lahore Garrison University, Lahore, Pakistan

<sup>4</sup>Chemical Engineering, Competence Centre for Catalysis, Chalmers University of Technology, SE-412 96, Gothenburg, Sweden

<sup>5</sup>Dpt Physics and Earth Sciences, University of Ferrara, Ferrara, Italy

**Table S1** : Mass % and Scherrer crystallite size of phases at different temperatures in the XRD thermal ramp of (Cu,Ni)Al samples

| T / °C | Mass %                         |      |        |              |      |        |              |      |        |              |     |        |          |     |        |
|--------|--------------------------------|------|--------|--------------|------|--------|--------------|------|--------|--------------|-----|--------|----------|-----|--------|
|        | Ni75Al25                       |      |        | Cu07Ni68Al25 |      |        | Cu38Ni37Al25 |      |        | Cu68Ni07Al25 |     |        | Cu75Al25 |     |        |
|        | CuO                            | NiO  | spinel | CuO          | NiO  | spinel | CuO          | NiO  | spinel | CuO          | NiO | spinel | CuO      | NiO | spinel |
| 300    | -                              | 40.1 | -      | -            | 47.8 | -      | 3.5          | 8.1  | -      | 24.6         | -   | -      | 11.8     | -   | -      |
| 400    | -                              | 44.1 | -      | -            | 50.4 | -      | 3.5          | 7.5  | -      | 29.7         | -   | -      | 11.3     | -   | -      |
| 500    | -                              | 47.4 | -      | -            | 52.6 | -      | 6.9          | 18.0 | -      | 29.8         | -   | -      | 11.8     | -   | -      |
| 600    | -                              | 53.3 | -      | -            | 49.4 | -      | 8.2          | 21.3 | -      | 36.4         | -   | -      | 35.9     | -   | -      |
| 700    | -                              | 55.6 | -      | -            | 50.9 | -      | 19.3         | 25.9 | -      | 44.0         | -   | -      | 43.7     | -   | 11.3   |
| 800    | -                              | 57.5 | -      | -            | 52.6 | -      | 29.7         | 32.8 | -      | 50.5         | -   | 19.4   | 62.2     | -   | 36.6   |
| T / °C | Scherrer crystallite size / nm |      |        |              |      |        |              |      |        |              |     |        |          |     |        |
|        | Ni75Al25                       |      |        | Cu07Ni68Al25 |      |        | Cu38Ni37Al25 |      |        | Cu68Ni07Al25 |     |        | Cu75Al25 |     |        |
|        | CuO                            | NiO  | spinel | CuO          | NiO  | spinel | CuO          | NiO  | spinel | CuO          | NiO | spinel | CuO      | NiO | spinel |
| 300    | -                              | 2.5  | -      | -            | 2.1  | -      | -            | -    | -      | 8.4          | -   | -      | 7.7      | -   | -      |
| 400    | -                              | 2.5  | -      | -            | 2.2  | -      | -            | -    | -      | 8.9          | -   | -      | 8.0      | -   | -      |
| 500    | -                              | 2.7  | -      | -            | 2.6  | -      | 10.5         | 4.7  | -      | 9.4          | -   | -      | 7.7      | -   | -      |
| 600    | -                              | 3.2  | -      | -            | 2.8  | -      | 12.0         | 4.4  | -      | 10.5         | -   | -      | 10.5     | -   | -      |
| 700    | -                              | 3.4  | -      | -            | 3.4  | -      | 15.3         | 7.4  | -      | 13.6         | -   | -      | 12.1     | -   | 11.5   |
| 800    | -                              | 4.0  | -      | -            | 3.9  | -      | 25.5         | 11.4 | -      | 19.6         | -   | 9.6    | 16.2     | -   | 12.3   |

**Table S2** : Mass % and Scherrer crystallite size of phases at different temperatures in the XRD thermal ramp of (Cu,Ni)Fe samples

| T / °C | Mass %                         |      |        |              |      |        |              |      |        |              |     |        |          |     |        |
|--------|--------------------------------|------|--------|--------------|------|--------|--------------|------|--------|--------------|-----|--------|----------|-----|--------|
|        | Ni75Fe25                       |      |        | Cu07Ni68Fe25 |      |        | Cu38Ni37Fe25 |      |        | Cu68Ni07Fe25 |     |        | Cu75Fe25 |     |        |
|        | CuO                            | NiO  | spinel | CuO          | NiO  | spinel | CuO          | NiO  | spinel | CuO          | NiO | spinel | CuO      | NiO | spinel |
| 300    | -                              | 58.2 | -      | -            | 25.6 | -      | 15.1         | 21.6 | -      | 46.0         | -   | -      | 47.7     | -   | -      |
| 400    | -                              | 65.4 | -      | -            | 30.7 | -      | 18.8         | 31.9 | -      | 44.8         | -   | -      | 50.4     | -   | -      |
| 500    | -                              | 61.1 | -      | -            | 31.6 | -      | 18.8         | 36.3 | -      | 47.7         | -   | -      | 52.7     | -   | -      |
| 600    | -                              | 52.0 | -      | -            | 29.8 | 12.8   | 20.9         | 40.1 | 16.9   | 40.8         | 2.6 | 11.1   | 51.9     | -   | 18.7   |
| 700    | -                              | 55.6 | 3.8    | -            | 43.9 | 20.8   | 32.6         | 38.5 | 25.6   | 55.7         | 4.3 | 31.2   | 57.0     | -   | 25.6   |
| 800    | -                              | 44.9 | 12.3   | -            | 63.5 | 36.5   | 27.1         | 35.3 | 37.6   | 54.1         | 4.0 | 27.3   | 56.9     | -   | 25.3   |
| T / °C | Scherrer crystallite size / nm |      |        |              |      |        |              |      |        |              |     |        |          |     |        |
|        | Ni75Fe25                       |      |        | Cu07Ni68Fe25 |      |        | Cu38Ni37Fe25 |      |        | Cu68Ni07Fe25 |     |        | Cu75Fe25 |     |        |
|        | CuO                            | NiO  | spinel | CuO          | NiO  | spinel | CuO          | NiO  | spinel | CuO          | NiO | spinel | CuO      | NiO | spinel |
| 300    | -                              | 2.1  | -      | -            | 2.4  | -      | 7.0          | 2.4  | -      | 50.7         |     |        | 6.0      | -   | -      |
| 400    | -                              | 2.4  | -      | -            | 2.8  | -      | 6.0          | 3.4  | -      | 49.3         |     |        | 6.0      | -   | -      |
| 500    | -                              | 3.1  | -      | -            | 3.6  | -      | 6.0          | 3.6  | -      | 52.5         |     |        | 5.6      | -   | -      |
| 600    | -                              | 3.9  | -      | -            | 5.0  | 8.2    | 9.4          | 5.7  | 9.1    | 44.9         |     | 12.2   | 8.4      | -   | 6.9    |
| 700    | -                              | 4.7  | 7.5    | -            | 8.1  | 7.5    | 16.8         | 9.3  | 13.7   | 61.4         |     | 34.3   | 16.9     | -   | 12.7   |
| 800    | -                              | 7.4  | 13.7   | -            | 18.3 | 16.5   | 25.5         | 12.6 | 16.5   | 59.4         |     | 30.0   | 32.5     | -   | 25.7   |

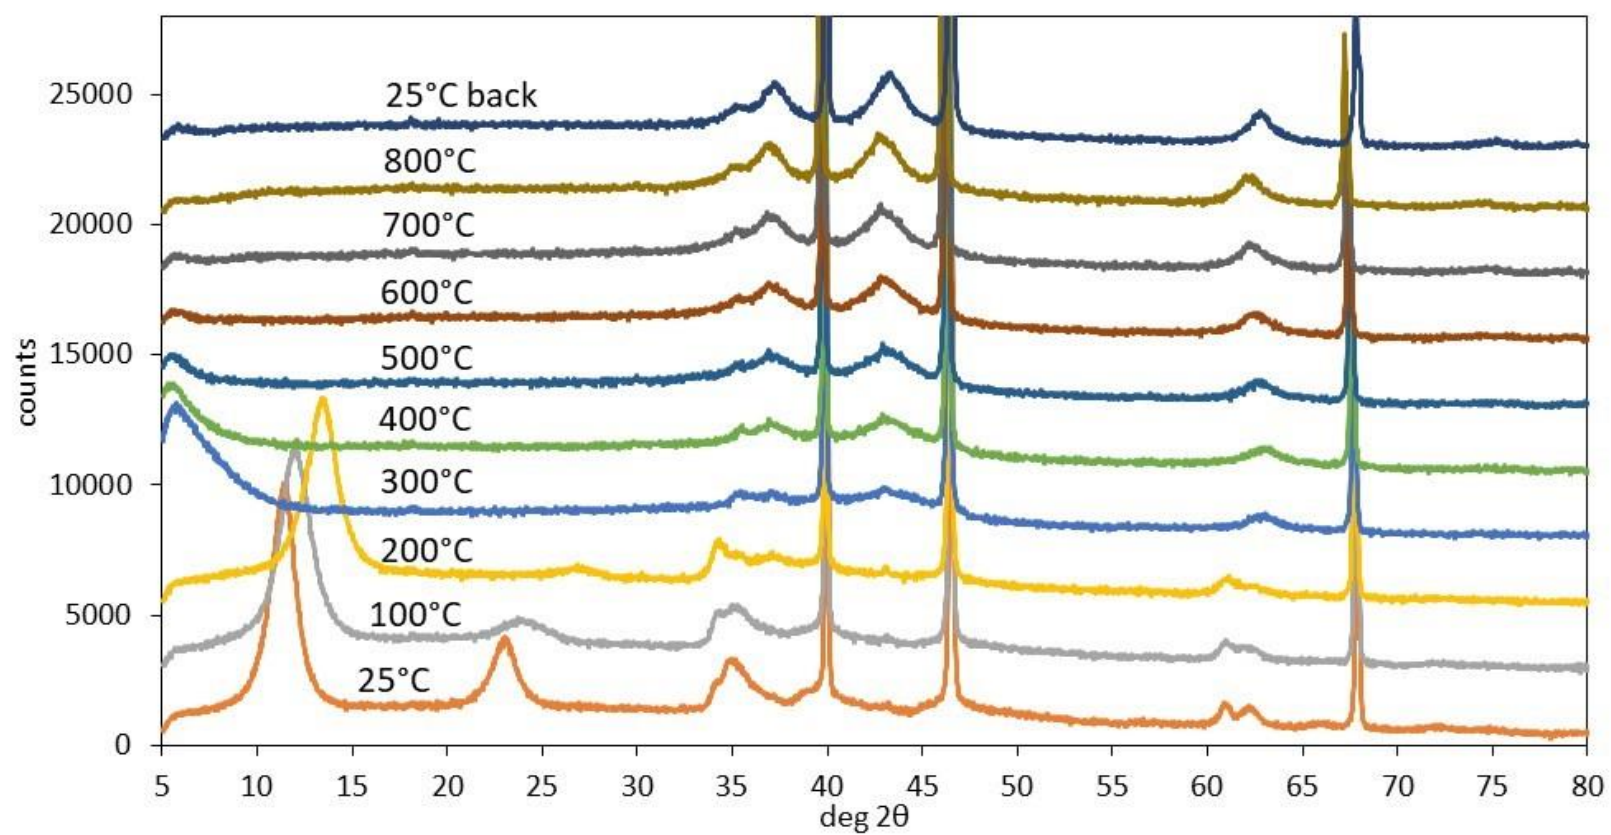

**Figure S1.** XRD patterns of Ni<sub>75</sub>Al<sub>25</sub>: temperature ramp from room temperature to 800°C and back.

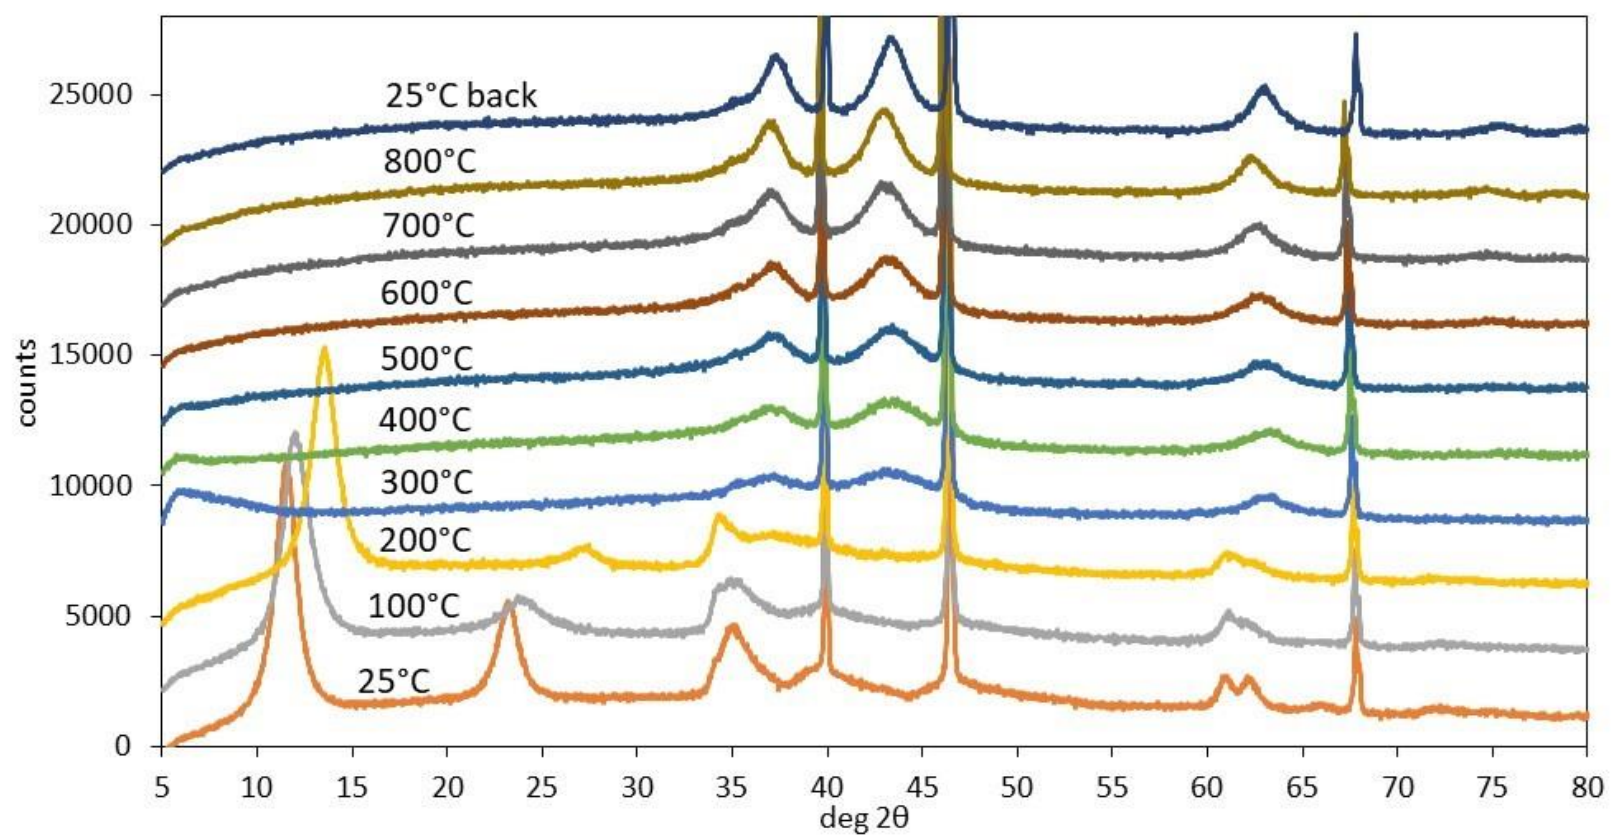

**Figure S2.** XRD patterns of Cu<sub>0.7</sub>Ni<sub>0.68</sub>Al<sub>25</sub>: temperature ramp from room temperature to 800°C and back.

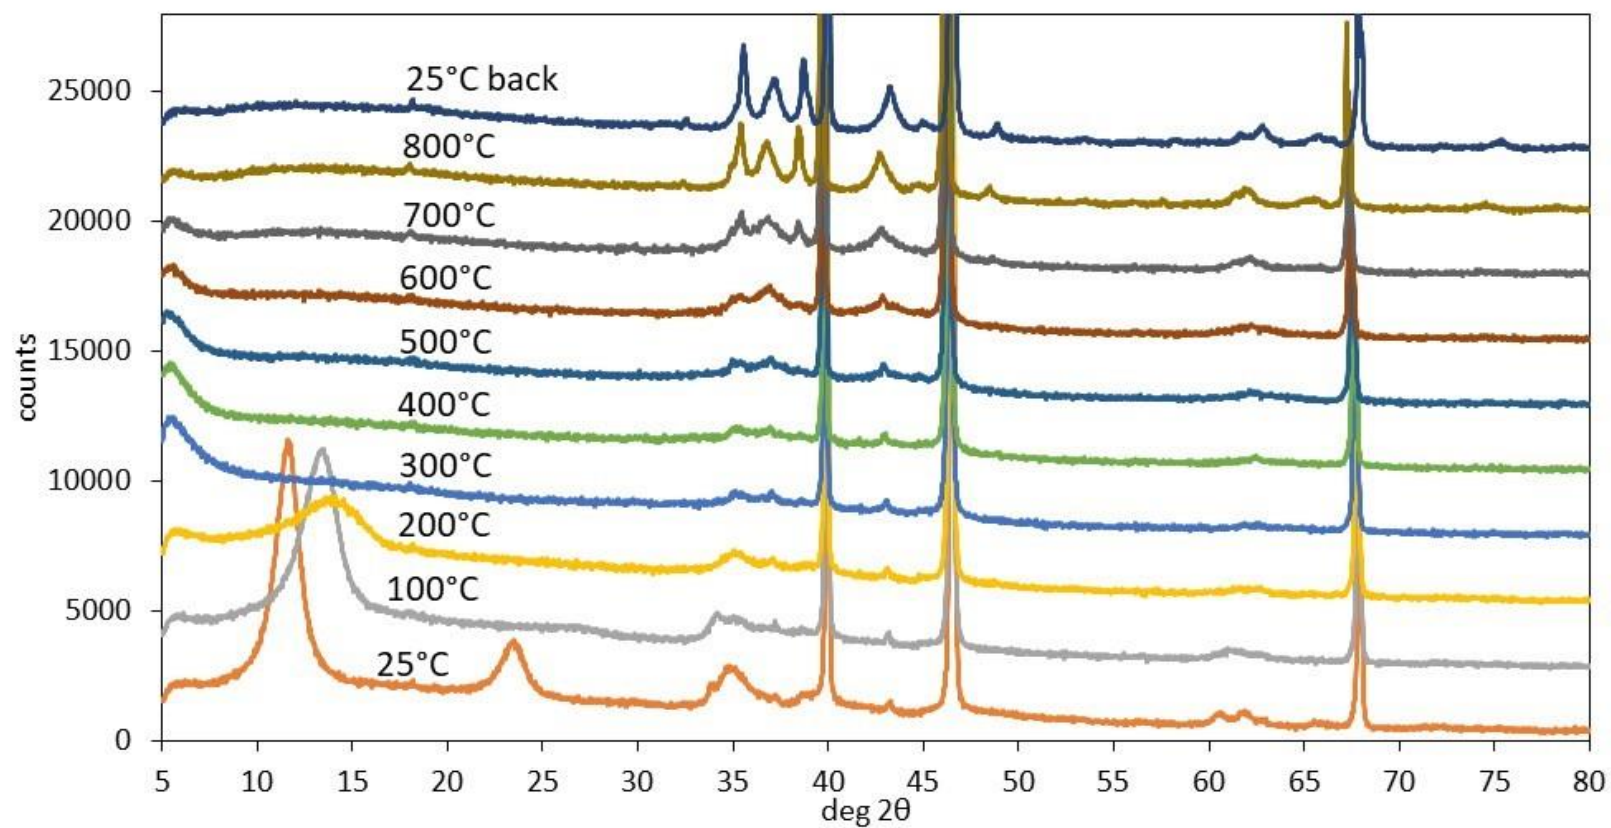

**Figure S3.** XRD patterns of Cu<sub>38</sub>Ni<sub>37</sub>Al<sub>25</sub>: temperature ramp from room temperature to 800 °C and back.

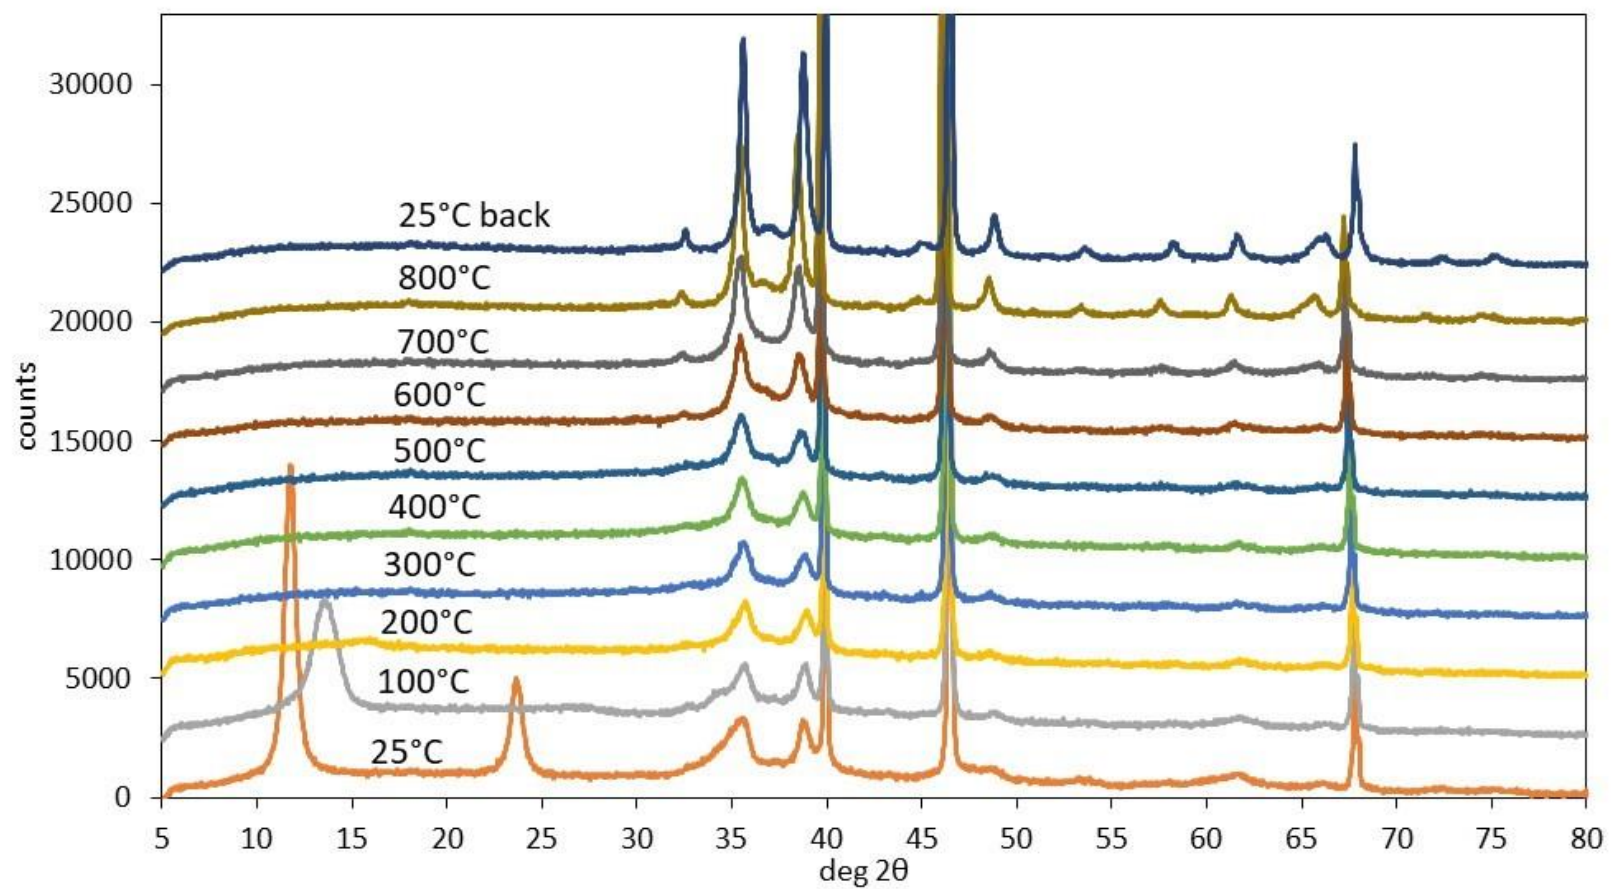

**Figure S4.** XRD patterns of Cu<sub>68</sub>Ni<sub>07</sub>Al<sub>25</sub>: temperature ramp from room temperature to 800 °C and back.



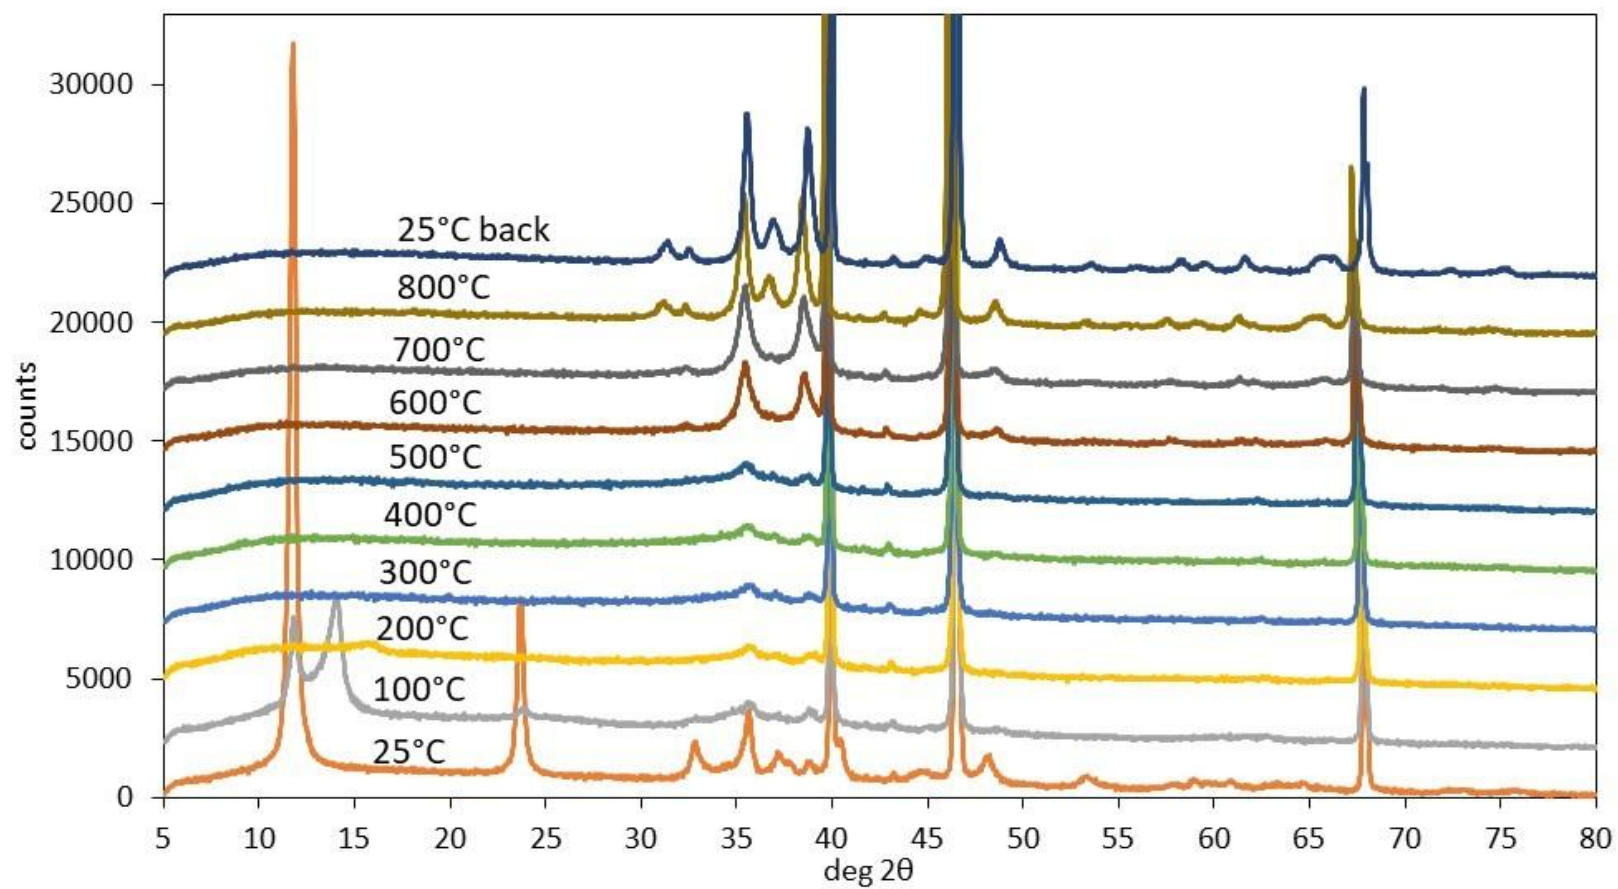

**Figure S5.** XRD patterns of Cu<sub>75</sub>Al<sub>25</sub>: temperature ramp from room temperature to 800 °C and back.



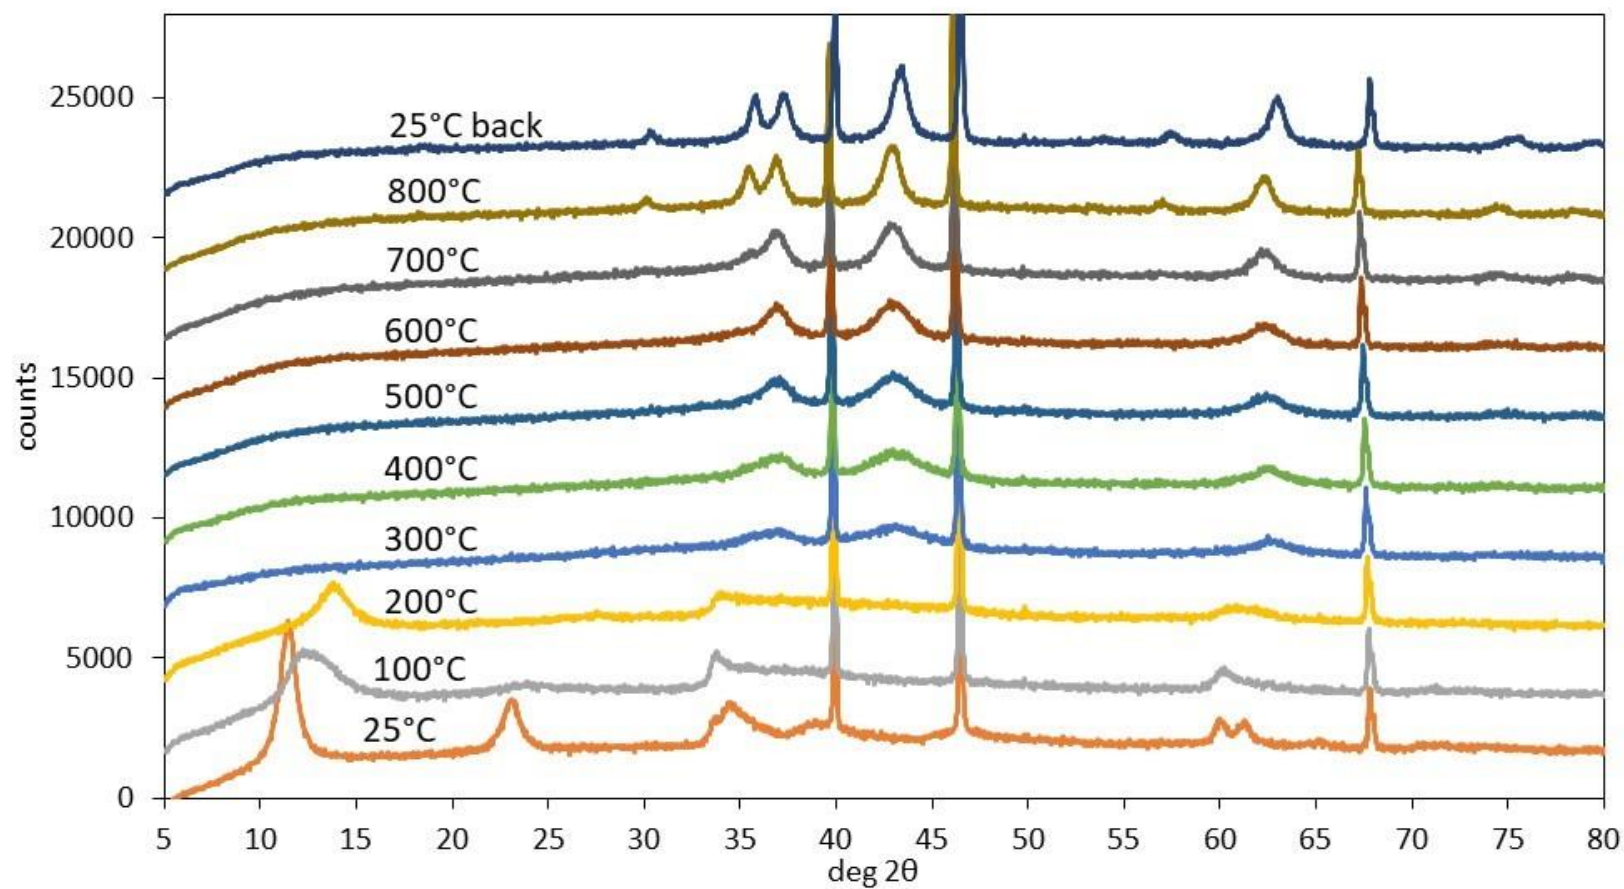

**Figure S6.** XRD patterns of Ni<sub>75</sub>Fe<sub>25</sub>: temperature ramp from room temperature to 800 °C and back.

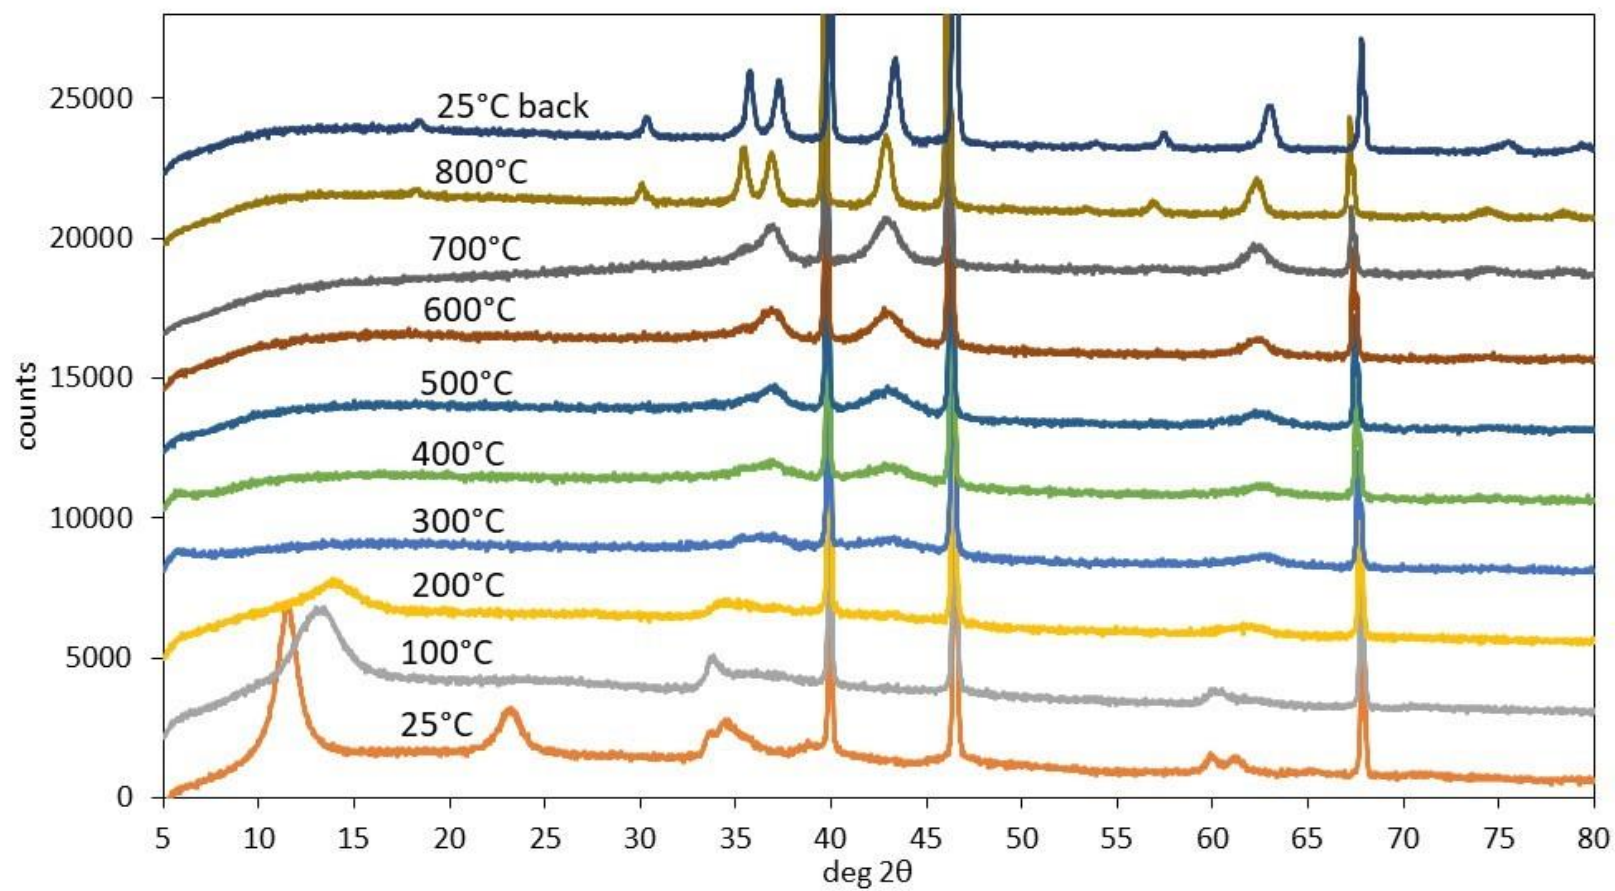

**Figure S7.** XRD patterns of  $\text{Cu}_{0.7}\text{Ni}_{0.68}\text{Fe}_{0.25}$ : temperature ramp from room temperature to 800 °C and back.

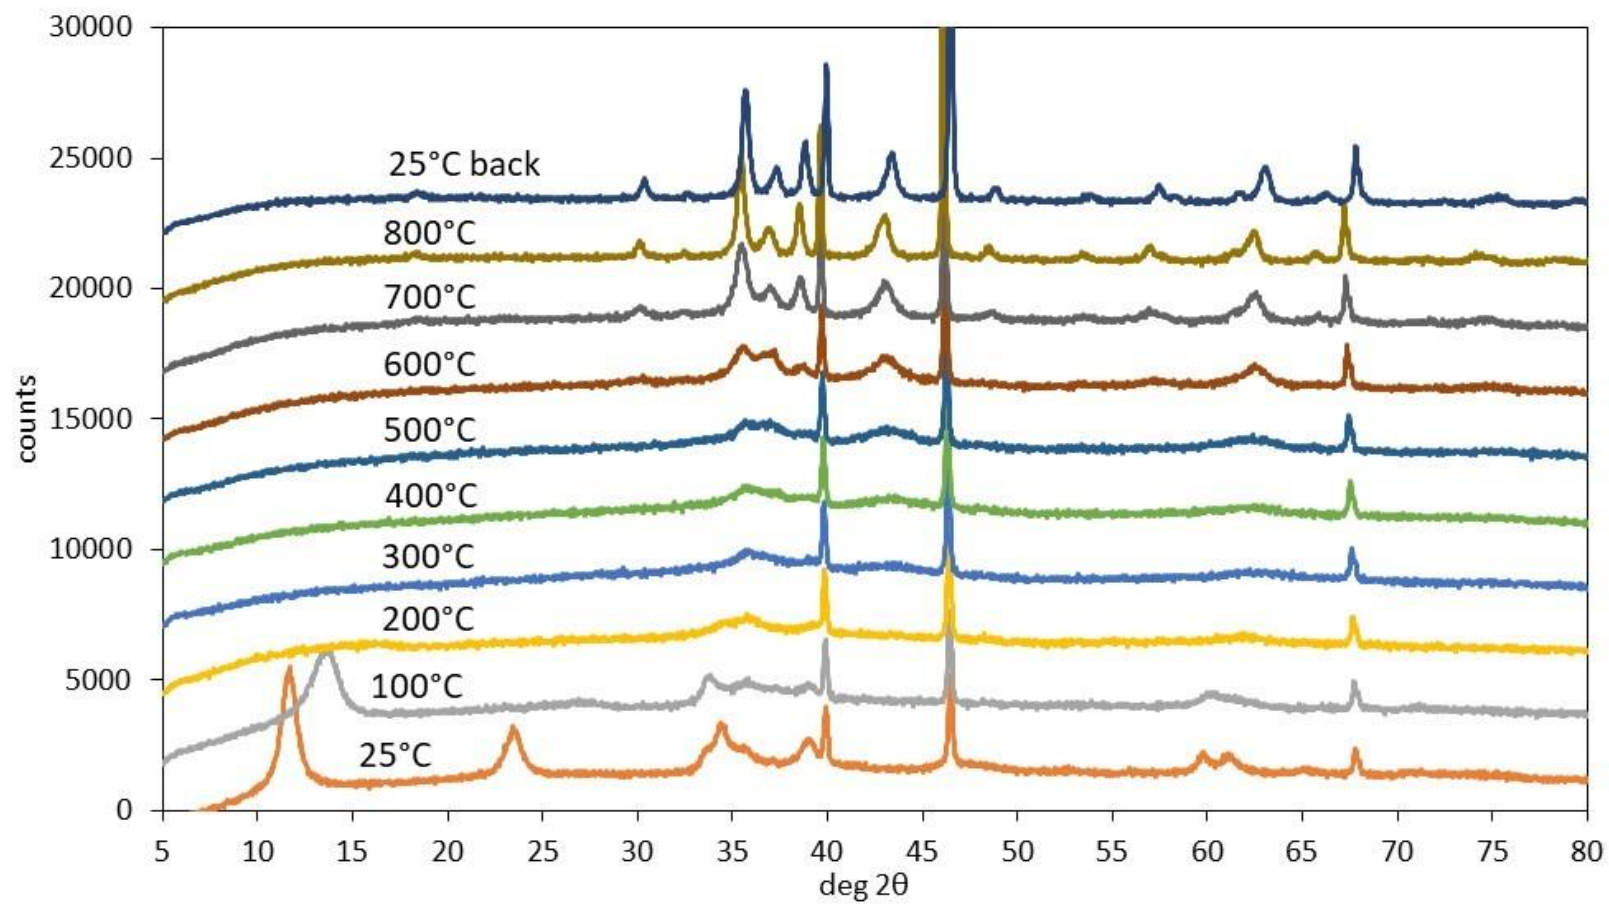

**Figure S8.** XRD patterns of Cu<sub>38</sub>Ni<sub>37</sub>Fe<sub>25</sub>: temperature ramp from room temperature to 800 °C and back.

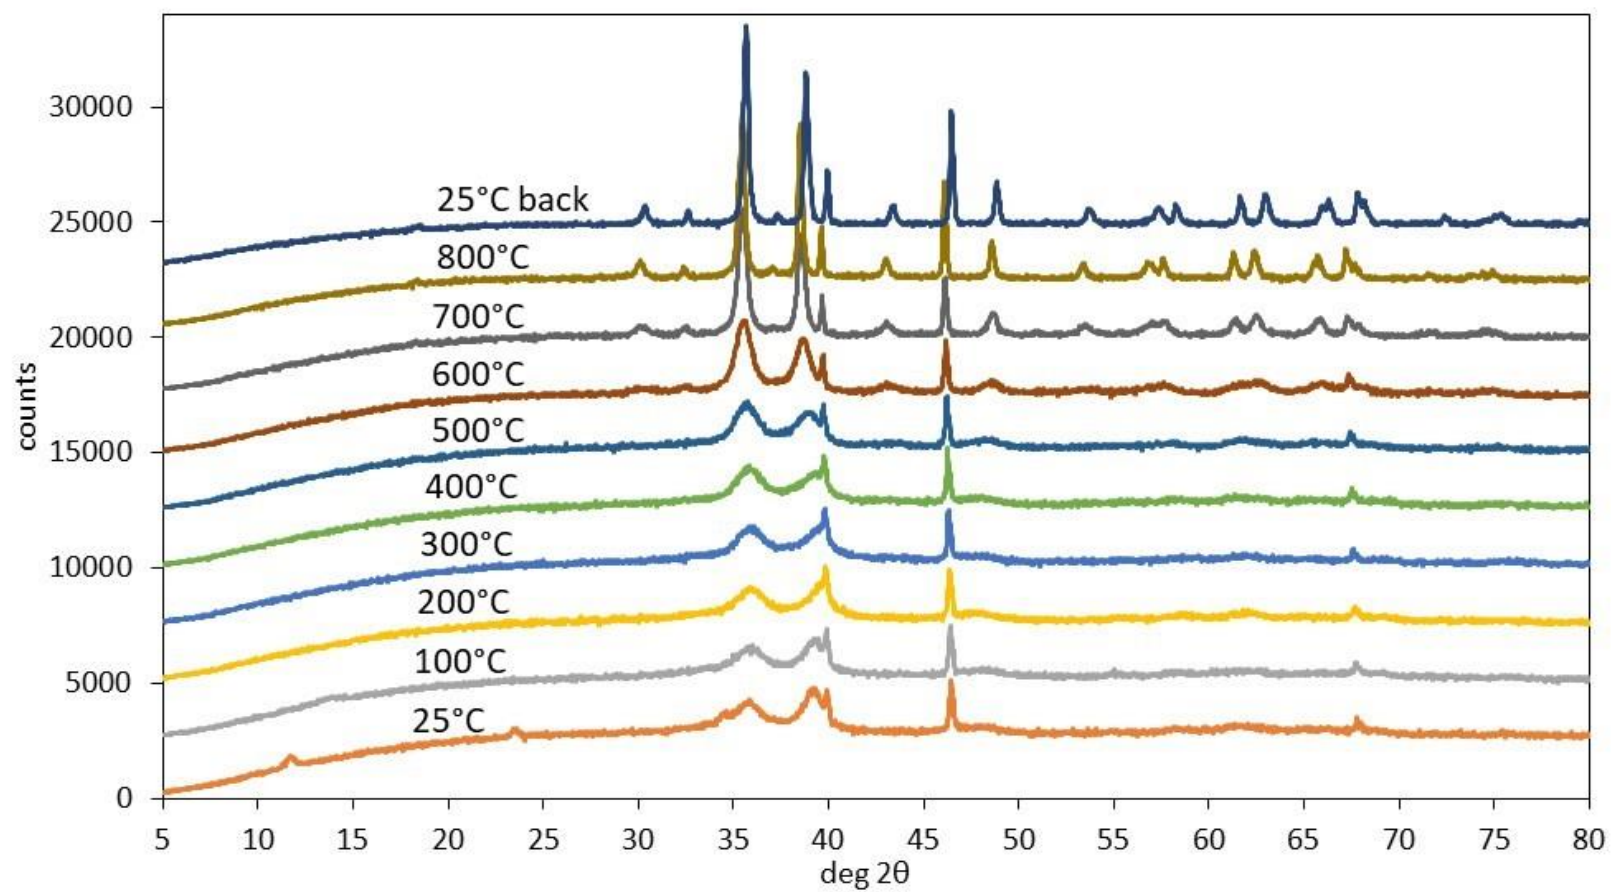

**Figure S9.** XRD patterns of Cu<sub>68</sub>Ni<sub>07</sub>Fe<sub>25</sub>: temperature ramp from room temperature to 800 °C and back.



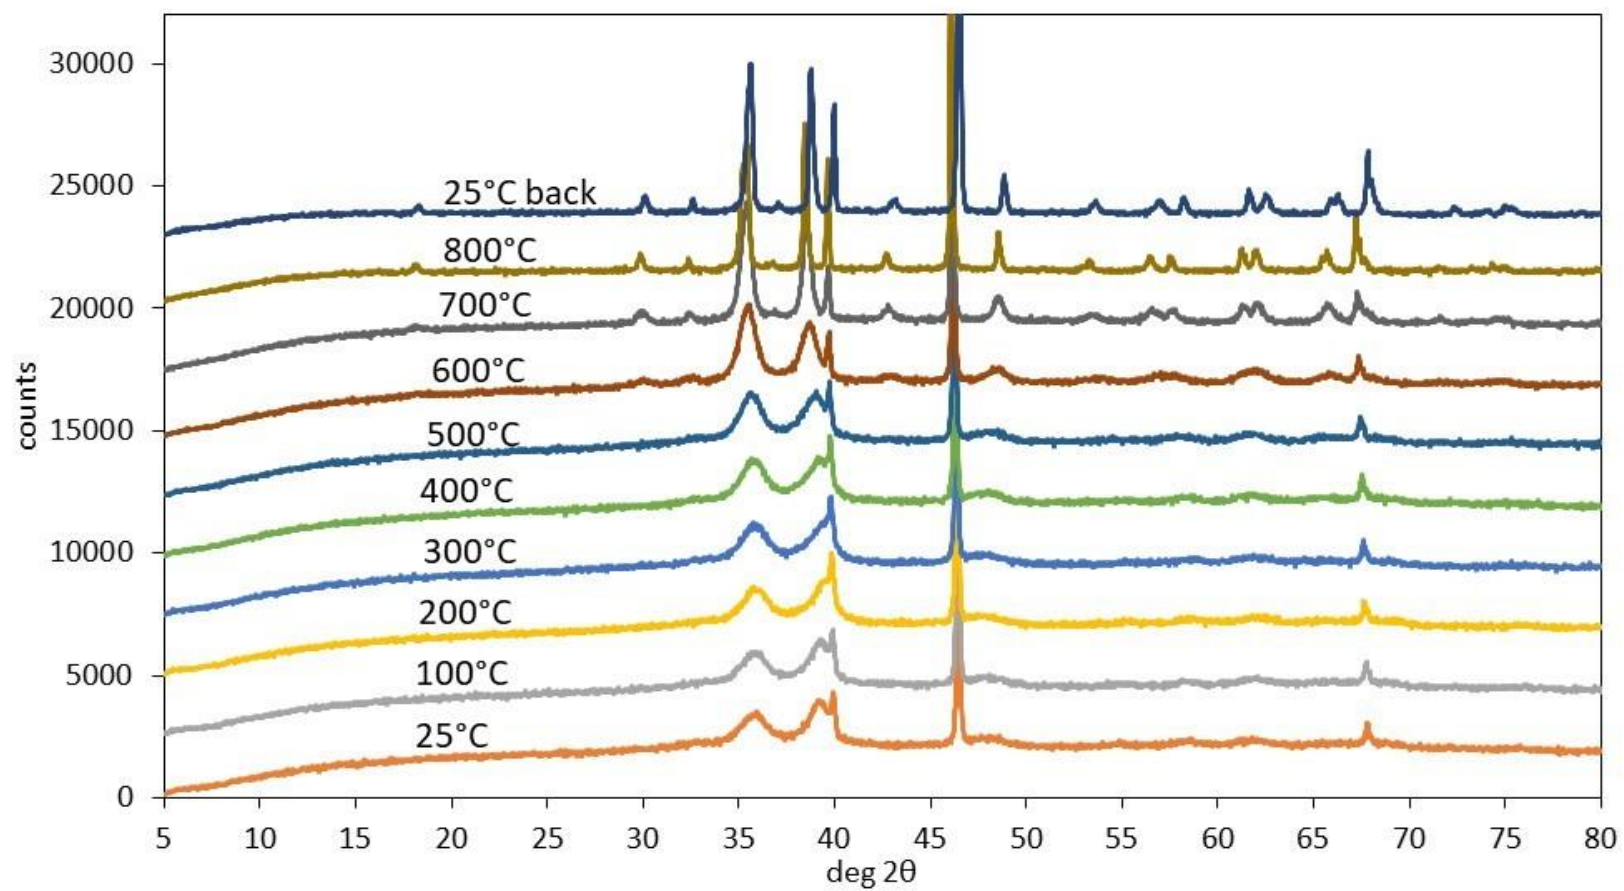

**Figure S10.** XRD patterns of Cu<sub>75</sub>Fe<sub>25</sub>: temperature ramp from room temperature to 800 °C and back.
